# Supplementary material for: Interaction of BES1 and LBD37 transcription factors modulates brassinosteroid-regulated root forging response under low nitrogen in arabidopsis
Source: Front Plant Sci. 2022 Sep 28;13:998961. doi: 10.3389/fpls.2022.998961 (PMC9555238; doi:10.3389/fpls.2022.998961)
Supplement: Supplementary file 2 [file Table_1.xlsx]

## Sheet: Sheet1
Supplemental table 1. Primers used in this paper
Primer Name	Sequence (5'-3')
qPCR-BES1-F	CAATGAGGTTCTTAAGGCTCT
qPCR-BES1-R	AATGAAGAAGAGGAAGGACT
qPCR-LBD37-F	TGCTTTGTTTCAGTCGTTGCTC
qPCR-LBD37-R	TGCTCCGTTAACTGGATTGACA
qPCR-LBD38-F	TGCCCTGCTTTGTTTCAGTCTT
qPCR-LBD38-R	CGTTCACCGGATTCACAGTTCT
qPCR-LBD39-F	GAACTCCAACGTCCTGCTTTGT
qPCR-LBD39-R	ATACCAACCGCTCCGTTAACC
qPCR-NRT1.1-F	CTGCCACACACTGAACAATTCC
qPCR-NRT1.1-R	CCCGCTTCCTGATCCCTTAT
qPCR-NRT2.1-F	TTGCTTTCTCGGTGCAATCAC
qPCR-NRT2.1-R	TGCTCTGTGTCCACCGGAA
qPCR-ANR1-F	CGAAGGATCGATAACTCTAC
qPCR-ANR1-R	ATCTCTGAGGCATGATTCAG
ChIP-LBD37-p1-F	CACGATCGTGTATAATGC
ChIP-LBD37-p1-R	CTAACGGATTCCTCCTAATC
ChIP-LBD37-p2-F	GGTAGGTCTCTTAAGGATGT
ChIP-LBD37-p2-R	CAATGCAATACCAGAGAGAT
ChIP-LBD37-p3-F	GGGTTAATCTGAAAGTCTGG
ChIP-LBD37-p3-R	ATCCACCATGTCTATTAGGC
ChIP-LBD37-p4-F	GACAGCAAATGGTTCTATTG
ChIP-LBD37-p4-R	GATGCCTGCATAGGTTAACG
ChIP-LBD37-p5-F	CAAATGGCCATGATTAGTTA
ChIP-LBD37-p5-R	GCTTATATTGATGTGTGGTTG
ChIP-LBD38-p1-F	GCCGTTTCACCGCATTGCTA
ChIP-LBD38-p1-R	CCACTACCTGACCCTTAAAT
ChIP-LBD38-p2-F	TCTATCTTGTTGCATTCAC
ChIP-LBD38-p2-R	TTCGTTGAACTTCAGGTAC
ChIP-LBD39-p1-F	CTTATGTTGTGTCGTAGGTAC
ChIP-LBD39-p1-R	CCACGATTGCCTAACTGTGA
ChIP-LBD39-p2-F	CTCTTATTAGGTCAGAAGT
ChIP-LBD39-p2-R	GTACCTACGACACAACATA
ChIP-NRT2.1-F	CACGCAATTTGACGGATAC
ChIP-NRT2.1-R	ACACGATGGCTTATATAGGG
pNRT2.1-F	CGGGGTACCTTACGTGGCTCGCTGCCTT
pNRT2.1-R	TGCTCTAGAACACGATGGCTTATATAGGG
GAD-LBD37-F	CCGGAATTCATGAGCTGCAATGGTTGCCG
GAD-LBD37-R	CGCGGATCCTTAAACAAAAAGGTTAAGCA
GAD-LBD38-F	CCGGAATTCATGAGTTGCAATGGTTGTCG
GAD-LBD38-R	CGCGGATCCTCAAGCGAAGAGATTGAGCA
GAD-LBD39-F	CCGGAATTCATGAGTTGCAATGGATGTAG
GAD-LBD39-R	CGCGGATCCTTAAACAAAAAGGTTCAATA
GBK-BES1-F	CCGGAATTCATGAAAAGATTCTTCTATAA
GBK-BES1-R	AAACTGCAGTCAACTATGAGCTTTACCAT
HIS-BES1-F	CCGGAATTCCGGATGAAAAGATTCTTCTATAA
HIS-BES1-R	GAATGCGGCCGCTCAACTATGAGCTTTACCAT
MBP-LBD37-F	CGCGGATCCATGAGCTGCAATGGTTGCCG
MBP-LBD37-R	CGCGTCGACTTAAACAAAAAGGTTAAGCA
BES1-nLUC-F	CGGGGGACGAGCTCGGTACCATGAAAAGATTCTTCTATAA
BES1-nLUC-R	CGTACGAGATCTGGTCGACACTATGAGCTTTACCAT
LBD37-cLUC-F	ACGCGTCCCGGGGCGGTACCATGAGCTGCAATGGTTGCCG
LBD37-cLUC-R	GAAAGCTCTGCAGGTCGACTTAAACAAAAAGGTTAAGCA
BES1-GFP-F	CCGGAATTCATGAAAAGATTCTTCTATAA
BES1-GFP-R	AAACTGCAGACTATGAGCTTTACCAT
FLAG-HA-LBD37-F	CGCGTCGACATGAGCTGCAATGGTTGCCG
FLAG-HA-LBD37-R	CGGGGTACCTTAAACAAAAAGGTTAAGCA
